# Supplementary material
Source: bioRxiv or medRxiv preprint supplement (https://www.biorxiv.org/highwire/filestream/90127/field_highwire_adjunct_files/0/292680-1.pdf)
Supplement: Supplementary file [file 292680-1.pdf]

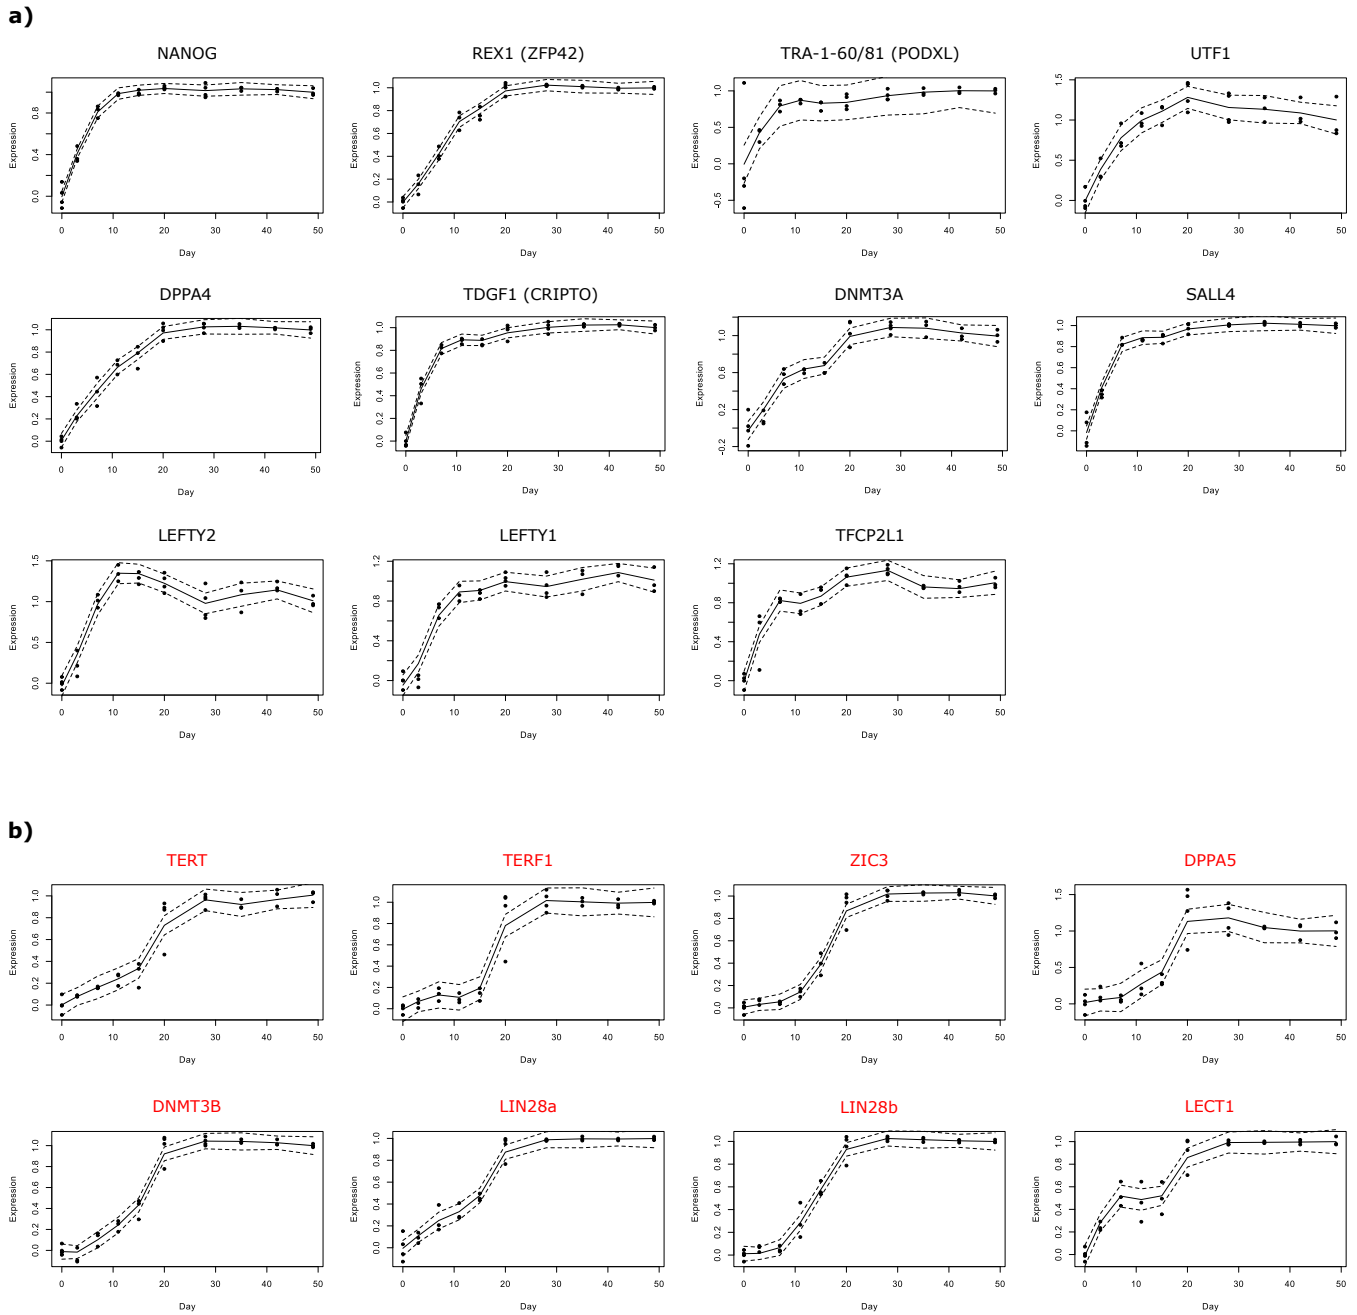

**Figure S1. Expression of key pluripotency markers in a 49-day HDF reprogramming time-course.**

Individual expression dynamics of Cluster 1 genes (early pluripotency markers) in (a) and Cluster 2 genes (late expressing pluripotency markers) in (b). Values are LOG2 transformed and normalised between 0 and 1 for 'day 0' and 'day 49' respectively, based on the average values between biological replicates for each time point. Dotted line marks CI. Gene label colours correspond to cluster colours in Fig. 1A.

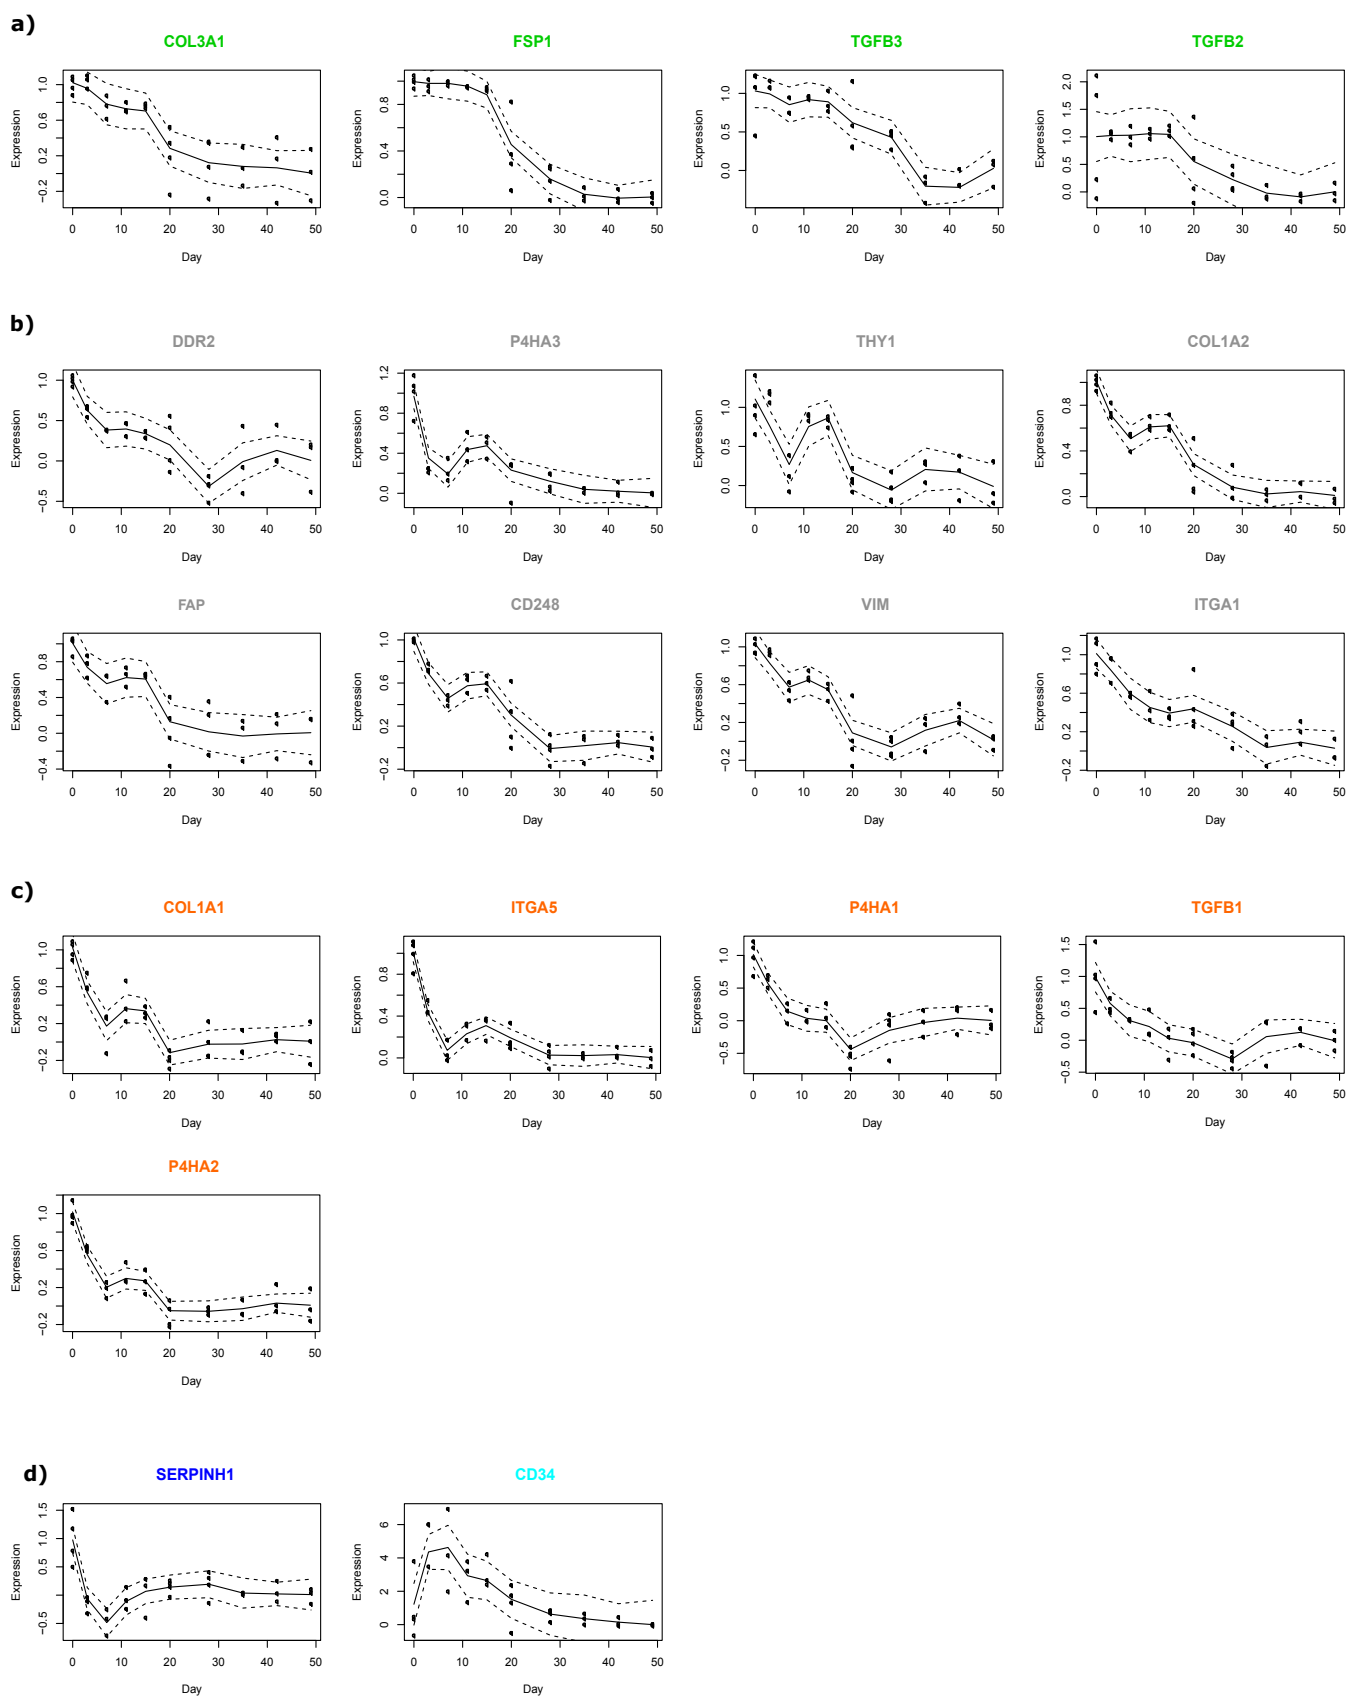

**Figure S2. Expression of key fibroblast somatic markers in a 49-day HDF reprogramming time-course.** Individual expression dynamics of Cluster 1 fibroblast genes (a), Cluster 2 (b) and Cluster 3 genes (c). Values are LOG2 transformed and normalised between 0 and 1 for 'day 0' and 'day 49' respectively, based on the average values between biological replicates for each time point. Dotted line marks CI. Gene label colours correspond to cluster colours in Fig. 1B. SERPINH1 and CD34 expression could not be fitted in any of the above clusters and are presented separately (d).
